# Supplementary material
Source: publisher figshare collection journal article supplement (https://tandf.figshare.com/articles/dataset/_/1252096)
Supplement: Supplementary file 1 [file 3]

# Reply To Report

Klaus Schiefermayr\*

October 10, 2014

1. I have consulted the paper [1] of B.C. Carlson but in my opinion there is no chance to get the limiting values as  $k \rightarrow 1$  from this paper.
2. Of course I have consulted the corresponding chapters of the famous NIST handbook of Mathematical Functions, but no limiting values (as  $k \rightarrow 1$ ) for Jacobi's theta functions are given there.
3. The reason that I have chosen the old notation of the theta functions (Jacobi's old notation) is the simple representation of the Jacobi's elliptic functions  $\operatorname{sn}$ ,  $\operatorname{cn}$  and  $\operatorname{dn}$  as a quotient of two theta functions, see formula (1) in my manuscript.
4. The crucial point is formula (5). Without this formula (or an analogous integral formula for  $\log(H(v-w)/H(v+w))$ ,  $\log(H_1(v-w)/H_1(v+w))$  or  $\log(\Theta_1(v-w)/\Theta_1(v+w))$ ) I don't think that it is possible to prove Theorem 1. Another possibility would eventually to find estimates for  $\Theta(u, k)/\Theta(0, k)$ . I have tried this way but the proofs are much harder.

---

\*University of Applied Sciences Upper Austria, School of Engineering and Environmental Sciences, Stelzhamerstrasse 23, 4600 Wels, Austria, KLAUS.SCHIEFERMAYR@FH-WELS.AT
