# Supplementary material
Source: publisher figshare collection journal article supplement (https://tandf.figshare.com/articles/dataset/_/1252096)
Supplement: Supplementary file 2 [file 3]

Archive with 2 entries (2 files):
- gitr_a_984293_sm9747.bib
- gitr_a_984293_sm9746.pdf
