# Supplementary material
Source: publisher figshare collection journal article supplement (https://tandf.figshare.com/articles/dataset/_/1252096)
Supplement: Supplementary file 2 [file 3 › gitr_a_984293_sm9747.bib]

@book {ByrdFriedman-1971,
   AUTHOR = {Byrd, P.F. and Friedman, M.D.},
    TITLE = {Handbook of elliptic integrals for engineers and scientists},
PUBLISHER = {Springer},
     YEAR = {1971},
}
@article {CarlsonTodd-1983,
    AUTHOR = {Carlson, B.C. and Todd, J.},
     TITLE = {The degenerating behavior of elliptic functions},
   JOURNAL = {SIAM J. Numer. Anal.},
    VOLUME = {20},
      YEAR = {1983},
     PAGES = {1120--1129},
}
@book {Lawden-1989,
    AUTHOR = {Lawden, D.F.},
     TITLE = {Elliptic functions and applications},
 PUBLISHER = {Springer},
      YEAR = {1989},
}
@book {NIST-2010,
     TITLE = {N{IST} handbook of mathematical functions},
    EDITOR = {Olver, F.W.J. and Lozier, D.W. and Boisvert, R.F. and Clark, C.W.},
 PUBLISHER = {U.S. Department of Commerce National Institute of Standards and Technology},
   ADDRESS = {Washington, DC},
      YEAR = {2010},
}
@article {Sch-2005,
    AUTHOR = {Schiefermayr, K.},
     TITLE = {Some new properties of {J}acobi's theta functions},
   JOURNAL = {J. Comput. Appl. Math.},
    VOLUME = {178},
      YEAR = {2005},
     PAGES = {419--424},
}
@book {WhittakerWatson-1962,
    AUTHOR = {Whittaker, E.T. and Watson, G.N.},
     TITLE = {A course of modern analysis},
 PUBLISHER = {Cambridge University Press},
      YEAR = {1962},
}
